# Supplementary material
Source: ML conference proceedings conference paper supplement (https://proceedings.mlr.press/v97/streeter19a.html)
Supplement: Supplementary file [file streeter19a-supp.pdf]

## Supplementary Material: Additional Proofs

To prove Theorem 2 we will use the following lemma.

**Lemma 1.** *Suppose that for some functions  $q$  and  $\phi$ , the loss function is of the form:*

$$\ell(z, \theta) = q(\theta) \cdot \phi(z).$$

Furthermore, suppose there exist constants  $n_0$  and  $\phi_0$  such that, for any training set  $Z = \{z_i \mid 1 \leq i \leq n\}$ , where  $Z \sim \mathcal{D}^n$  and  $\mathcal{D} \sim \mathcal{D}_1$ ,

$$\mathbb{E}_{\mathcal{D} \sim \mathcal{D}_1} [\mathbb{E}_{z \sim \mathcal{D}} [\phi(z)] \mid Z] = \frac{\phi_0 + \sum_{i=1}^n \phi(z_i)}{n + n_0}.$$

Then, there exists a perfect, Bayes-optimal regularizer of the form:

$$R^*(\theta) = \frac{1}{n} q(\theta) \cdot \phi_0.$$

*Proof.* Let  $\bar{L}(\theta, Z) \equiv \mathbb{E}_{\mathcal{D} \sim \mathcal{D}_1} [E_{z \sim \mathcal{D}} [\ell(z, \theta)] \mid Z]$  be the conditional expected test loss. By linearity of expectation,

$$\begin{aligned} \bar{L}(\theta, Z) &= q(\theta) \cdot E_{\mathcal{D} \sim \mathcal{D}_1} [E_{z \sim \mathcal{D}} [\phi(z)] \mid Z] \\ &= q(\theta) \cdot \frac{\phi_0 + \sum_{i=1}^n \phi(z_i)}{n + n_0}. \end{aligned}$$

Meanwhile, average training loss is  $\hat{L}(\theta) = \frac{1}{n} q(\theta) \cdot \sum_{i=1}^n \phi(z_i)$ . Thus,

$$(n + n_0) \bar{L}(\theta, Z) - n \hat{L}(\theta) = n R^*(\theta).$$

Rearranging,  $\hat{L}(\theta) + R^*(\theta) = \frac{n+n_0}{n} \bar{L}(\theta, Z)$ , so  $R^*$  is perfect and Bayes-optimal.  $\square$

*Proof of Theorem 2.* By assumption,  $P(z|\theta)$  is an exponential family distribution, meaning that for some functions  $h$ ,  $g$ ,  $\eta$ , and  $T$ , we have

$$P(z|\theta) = h(z) g(\theta) \exp(\eta(\theta) \cdot T(z)).$$

Setting  $q(\theta) = \langle -\log g(\theta) \rangle \oplus -\eta(\theta)$  and  $\phi(z) = \langle 1 \rangle \oplus T(z)$ , we have

$$-\log(P(z|\theta)) = q(\theta) \cdot \phi(z) - \log h(z).$$

Because the  $-\log h(z)$  term does not depend on  $\theta$ , minimizing  $-\log(P(z|\theta))$  is equivalent to using the loss function  $\ell(z, \theta) = q(\theta) \cdot \phi(z)$ .

The conjugate prior for an exponential family has the form

$$P(\eta(\theta)) = \frac{1}{Z_0} g(\theta)^{n_0} \exp(\eta(\theta) \cdot \tau_0)$$

where  $\tau_0$  and  $n_0$  are hyperparameters. One of the distinguishing properties of exponential families is that when  $\theta^*$

is drawn from a conjugate prior, the posterior expectation of  $T(z)$  has a linear form (Diaconis & Ylvisaker, 1979):

$$\mathbb{E}_{\theta^* \sim P(\theta)} [\mathbb{E}_{z \sim P(z|\theta^*)} [T(z)] \mid Z] = \frac{\tau_0 + \sum_{i=1}^n T(z_i)}{n_0 + n}.$$

Thus if we set  $\phi_0 = \langle n_0 \rangle \oplus \tau_0$ ,

$$\mathbb{E}_{\mathcal{D} \sim \mathcal{D}_1} [\mathbb{E}_{z \sim \mathcal{D}} [\phi(z)] \mid Z] = \frac{\phi_0 + \sum_{i=1}^n \phi(z_i)}{n + n_0}.$$

Lemma 1 then shows that a perfect regularizer is:

$$\begin{aligned} R_1^*(\theta) &= \frac{1}{n} q(\theta) \cdot \phi_0 \\ &= \frac{1}{n} (-n_0 \log(g(\theta)) - \tau_0 \cdot \eta(\theta)) \\ &= \frac{1}{n} (-\log P(\eta(\theta)) - \log(Z_0)). \end{aligned}$$

Because  $R_1^*$  and  $R^*$  differ by a constant,  $R^*$  is also perfect.  $\square$

## References

Diaconis, P. and Ylvisaker, D. Conjugate priors for exponential families. *The Annals of Statistics*, pp. 269–281, 1979.
